# Supplementary material for: Co-Loading of Temozolomide and Curcumin into a Calix[4]arene-Based Nanocontainer for Potential Combined Chemotherapy: Binding Features, Enhanced Drug Solubility and Stability in Aqueous Medium
Source: MDPI journal article supplement (doi:10.3390/nano11112930), 2021-11-02
Supplement: s1 [file s1]

## Supplementary Materials

# Co-loading of Temozolomide and Curcumin into a Calix[4]arene-Based Nanocontainer for Potential Combined Chemotherapy: Binding Features, Enhanced Drug Solubility and Stability in Aqueous Medium

Rossella Migliore <sup>1</sup>, Nicola D'Antona <sup>1</sup>, Carmelo Sgarlata <sup>2,\*</sup> and Grazia M. L. Consoli <sup>1,\*</sup>

<sup>1</sup> Istituto di Chimica Biomolecolare, Consiglio Nazionale delle Ricerche, Via Paolo Gaifami 18, 95126 Catania, Italy; rossella.migliore@unict.it (R.M.); nicola.dantona@icb.cnr.it (N.D.)

<sup>2</sup> Dipartimento di Scienze Chimiche, Università degli Studi di Catania, Viale Andrea Doria 6, 95125 Catania, Italy

\* Correspondence: sgarlata@unict.it (C.S.); grazia.consoli@icb.cnr.it (G.M.L.C.)

## Content

|                                                                                       |           |
|---------------------------------------------------------------------------------------|-----------|
| <b>Figure S1.</b> ITC titration of SC4OC6 into plain water                            | <b>S3</b> |
| <b>Table S1.</b> Thermodynamic parameters for SC4OC6 self-aggregation process         | <b>S4</b> |
| <b>Figure S2.</b> Hydrodynamic diameter distribution of SC4OC6                        | <b>S4</b> |
| <b>Figure S3.</b> UV-vis and fluorescence spectra of SC4OC6/CUR                       | <b>S5</b> |
| <b>Figure S4.</b> UV-vis spectra of SC4OC6/CUR over time                              | <b>S6</b> |
| <b>Figure S5.</b> UV-vis spectra of curcumin over time                                | <b>S6</b> |
| <b>Table S2.</b> Kinetic parameters for curcumin and for SC4OC6/CUR                   | <b>S7</b> |
| <b>Figure S6.</b> Hydrodynamic diameter distribution of SC4OC6/CUR                    | <b>S7</b> |
| <b>Figure S7.</b> Zeta potential distribution of SC4OC6/CUR                           | <b>S8</b> |
| <b>Figure S8.</b> UV-vis spectra of TMZ and SC4OC6/TMZ                                | <b>S8</b> |
| <b>Figure S9.</b> Overlapped <sup>1</sup> H NMR spectra of TMZ and SC4OC6/TMZ complex | <b>S9</b> |
| <b>Figure S10.</b> Hydrodynamic diameter distribution of SC4OC6/TMZ                   | <b>S9</b> |

|                                                                                                |            |
|------------------------------------------------------------------------------------------------|------------|
| <b>Figure S11.</b> UV-vis spectra of SC4OC6/TMZ over time                                      | <b>S10</b> |
| <b>Figure S12.</b> UV-vis spectra of TMZ over time                                             | <b>S10</b> |
| <b>Figure S13.</b> Overlapped <sup>1</sup> H NMR spectra of TMZ and lyophilized SC4OC6/CUR/TMZ | <b>S11</b> |
| <b>Figure S14.</b> Zeta potential distribution of SC4OC6/CUR/TMZ                               | <b>S11</b> |
| <b>Figure S15.</b> ITC titration of TMZ into SC4OC6                                            | <b>S12</b> |
| <b>Figure S16.</b> Typical “blank” experiment                                                  | <b>S12</b> |
| <b>Figure S17.</b> ITC titration and blank experiments of TMZ into SC4OC6                      | <b>S13</b> |
| <b>Figure S18.</b> Net heat curve for the TMZ - SC4OC6 (below CMC) system                      | <b>S13</b> |
| <b>Figure S19.</b> ITC titration of TMZ into SC4OH and integrated heat data                    | <b>S14</b> |
| <b>Figure S20.</b> UV-vis spectra of SC4OC6/CUR/TMZ over time                                  | <b>S15</b> |
| <b>Table S3.</b> Kinetic parameters for free TMZ, SC4OC6/TMZ and SC4OC6/CUR/TMZ                | <b>S16</b> |

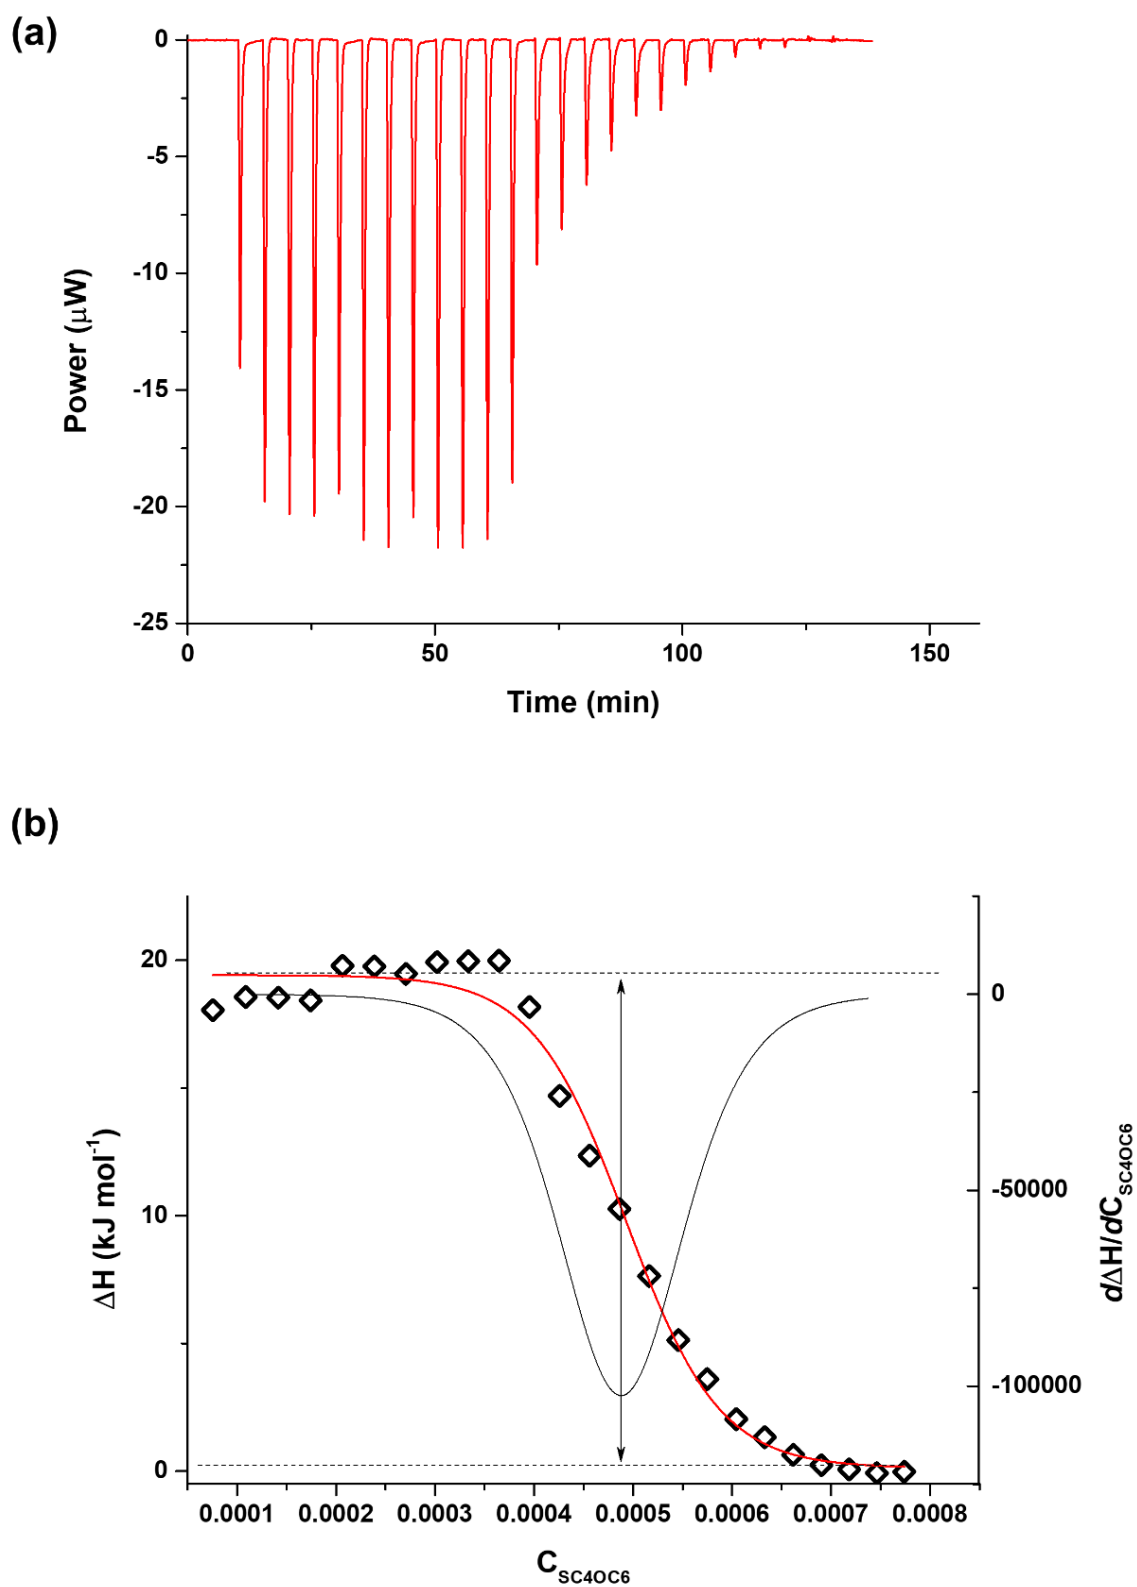

**Figure S1.** (a) ITC titration of SC4OC6 4 mM into plain water at 25 °C; (b) reaction enthalpy as a function of the total surfactant concentration ( $C_{\text{SC4OC6}}$ ) in the calorimetric cell.

**Table S1.** CMC and enthalpy values for SC4OC6 self-aggregation process at 25 °C.

|                              | CMC       | $\Delta H$              |
|------------------------------|-----------|-------------------------|
|                              | (mM)      | (kJ mol <sup>-1</sup> ) |
| Plain water                  | 0.492 (5) | -21.7 (2)               |
| Phosphate buffer (I = 20 mM) | 0.05 (1)  | -4.8 (2)                |

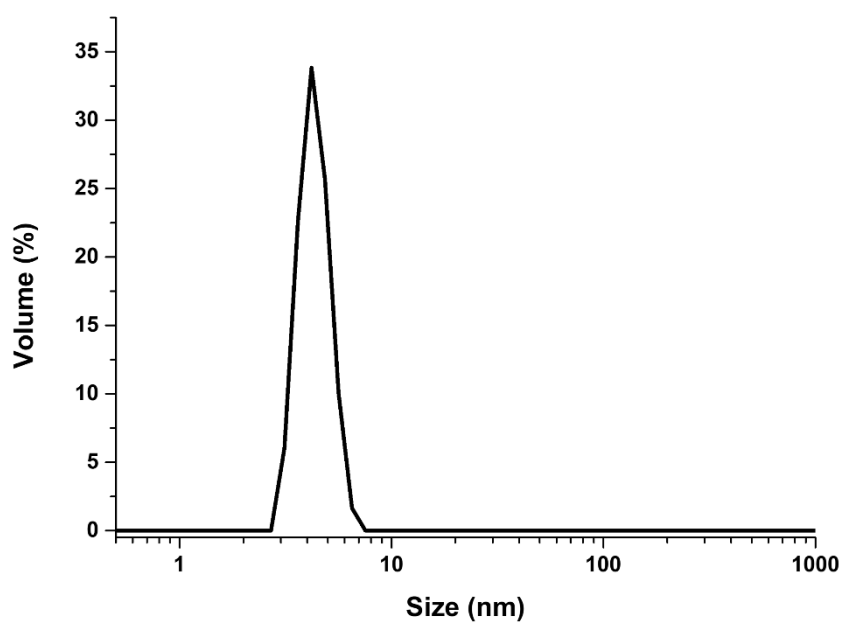

**Figure S2.** Volume weighted hydrodynamic diameter distribution of SC4OC6 (1.7 mM) in 10 mM phosphate buffer.

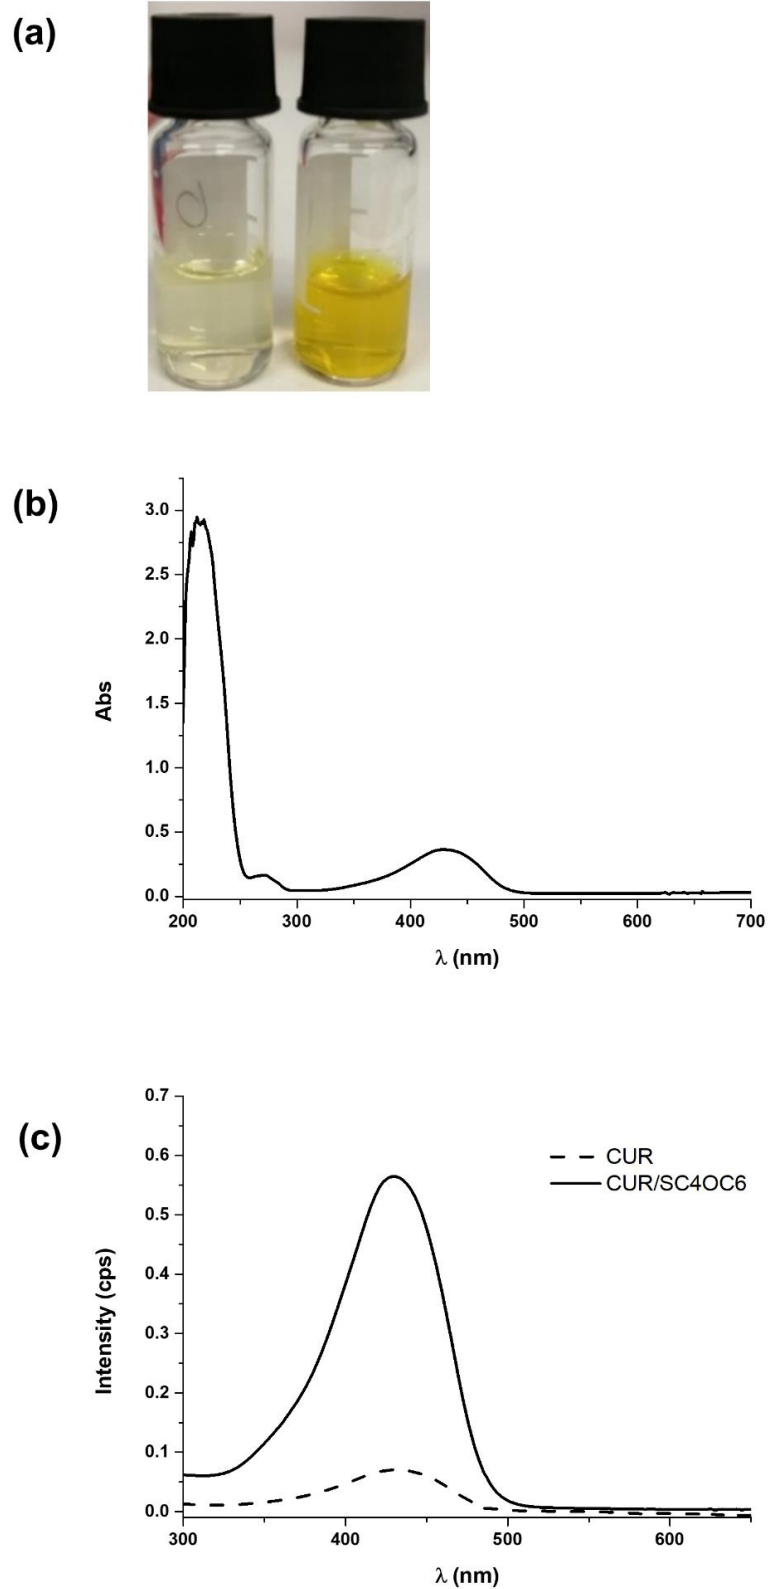

**Figure S3.** (a) Picture of the colloidal solution of CUR alone (right) and with SC4OC6 (left) in 10 mM phosphate buffer; (b) UV-vis spectrum of SC4OC6/CUR (0.091 mM/0.012 mM); (c) fluorescence spectra of CUR alone (0.0016 mM, dashed line) and CUR (0.012 mM, solid line) in the presence of SC4OC6 in 10 mM phosphate buffer.

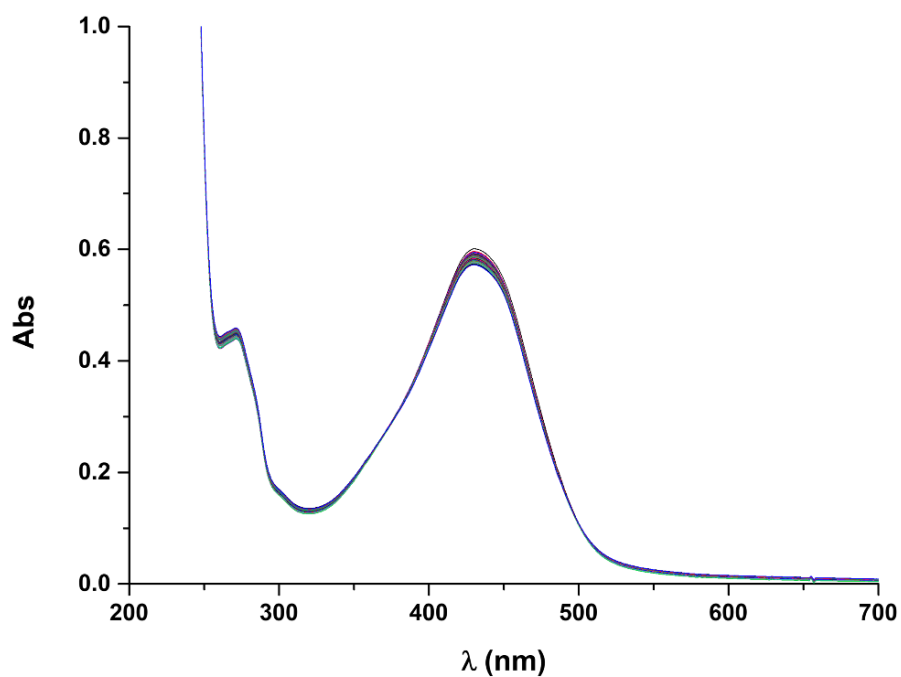

**Figure S4.** UV-vis spectra of SC4OC6/CUR (0.11 and 0.014 mM respectively) in 10 mM phosphate buffer recorded every 15 minutes at 37 °C.

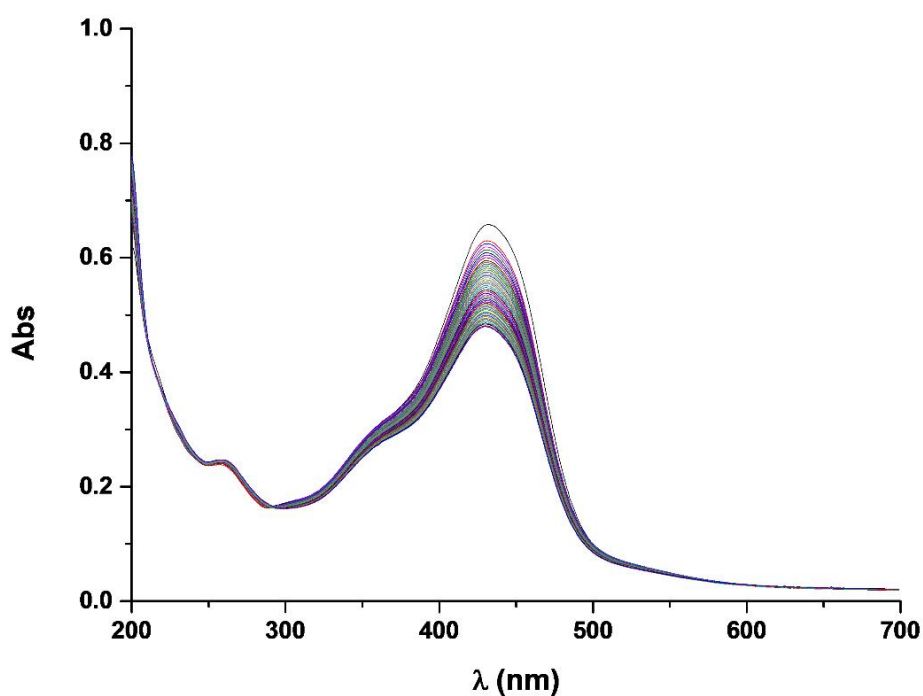

**Figure S5.** UV-vis spectra of curcumin (0.014 mM) in 30% ethanol/phosphate buffer recorded every 15 minutes at 37 °C.

**Table S2.** First order degradation rate constant and half-life values for curcumin in 30% ethanol/phosphate buffer and for SC4OC6/CUR in 10 mM phosphate buffer at 37 °C.

|                        | <b>k</b><br><b>(min<sup>-1</sup>)</b> | <b>t<sub>1/2</sub></b><br><b>(h)</b> |
|------------------------|---------------------------------------|--------------------------------------|
| Free CUR               | 0.00049 (1)                           | 23.5                                 |
| CUR in SC4OC6 micelles | 0.000075 (2)                          | 154                                  |

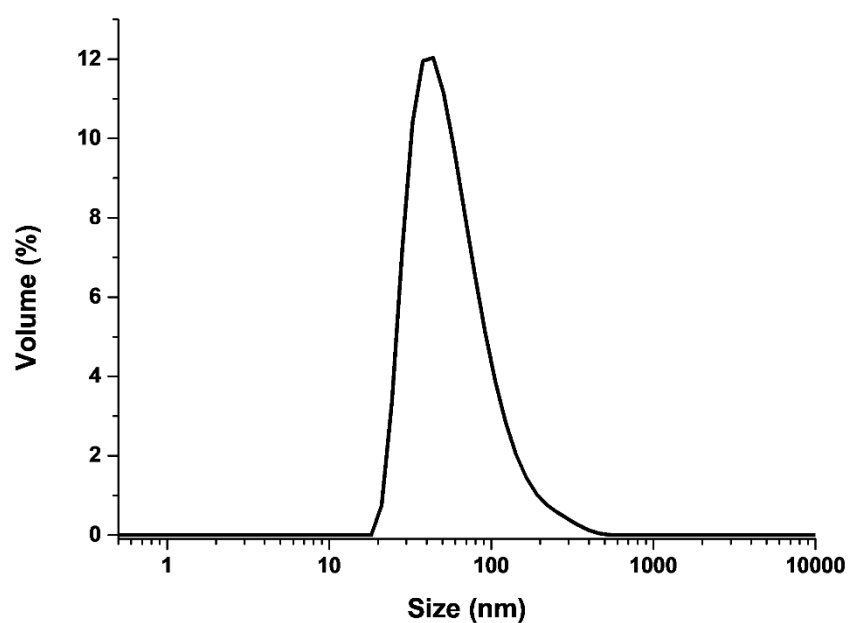

**Figure S6.** Volume weighted hydrodynamic diameter distribution of SC4OC6/CUR (0.85 mM/0.11 mM) in 10 mM phosphate buffer.

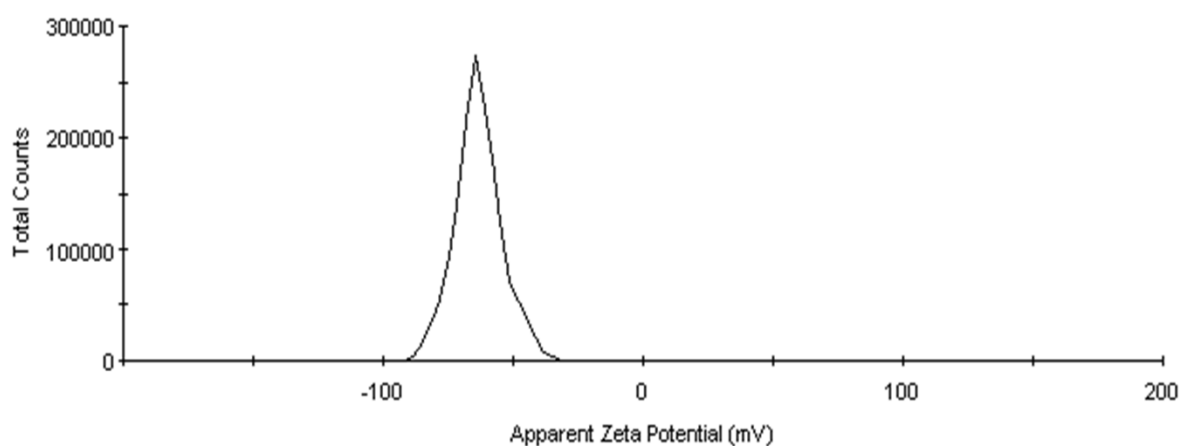

**Figure S7.** Zeta potential distribution of SC4OC6/CUR (0.85 mM/0.11 mM) in 10 mM phosphate buffer.

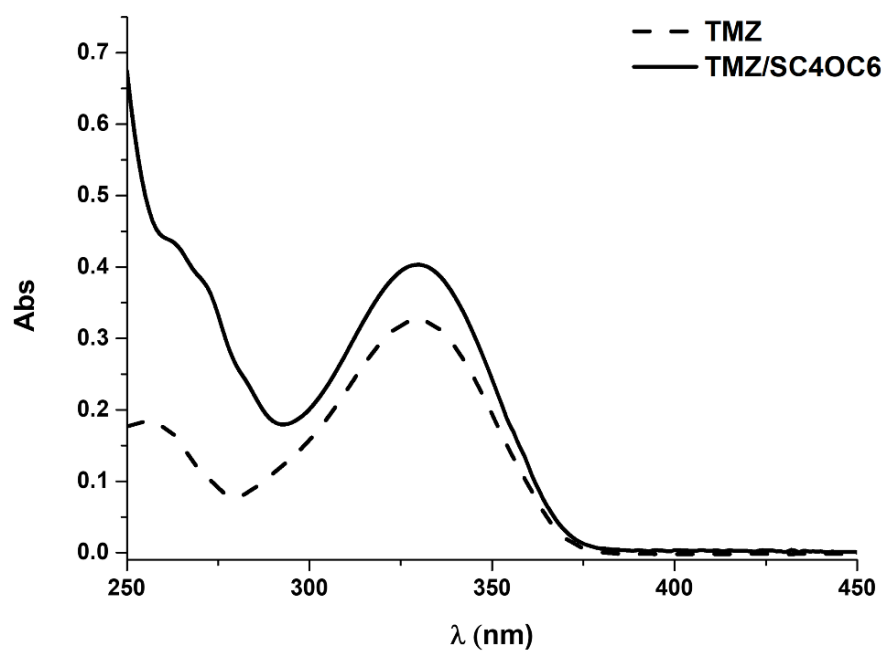

**Figure S8.** UV-vis spectra of TMZ alone (0.03 mM, dashed line) and TMZ (0.0365 mM) in the presence of SC4OC6 (solid line) in 10 mM phosphate buffer.



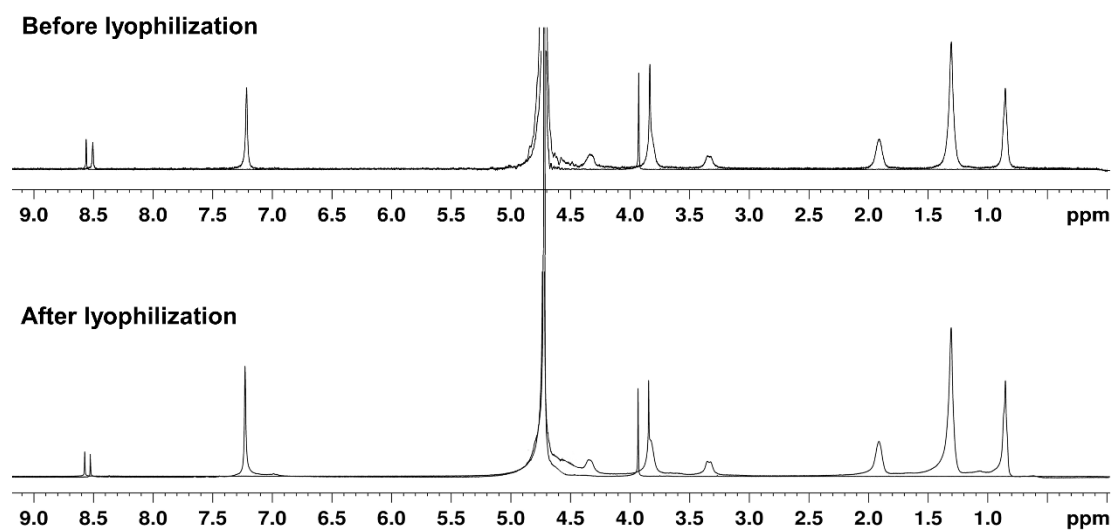

**Figure S9.** Overlapped  $^1\text{H}$  NMR spectra ( $\text{D}_2\text{O}$ , phosphate buffer, 297 K) of TMZ (4.5 mM) and SC4OC6/TMZ (7.4 mM/4.5 mM) complex before (up) and after (bottom) freeze-drying.

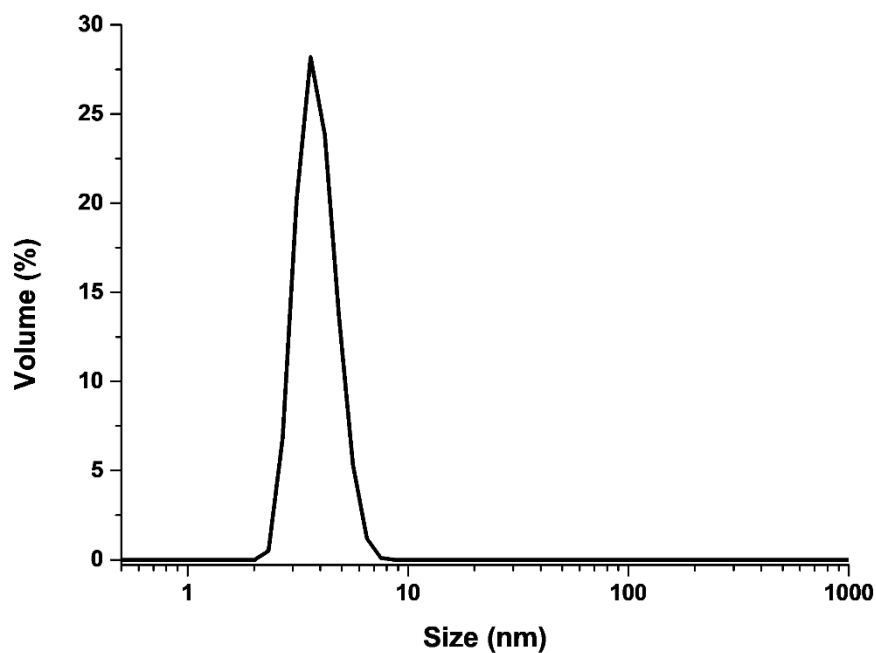

**Figure S10.** Volume weighted hydrodynamic diameter distribution of SC4OC6/TMZ (1.7 mM/1.03 mM) complex in 10 mM phosphate buffer.

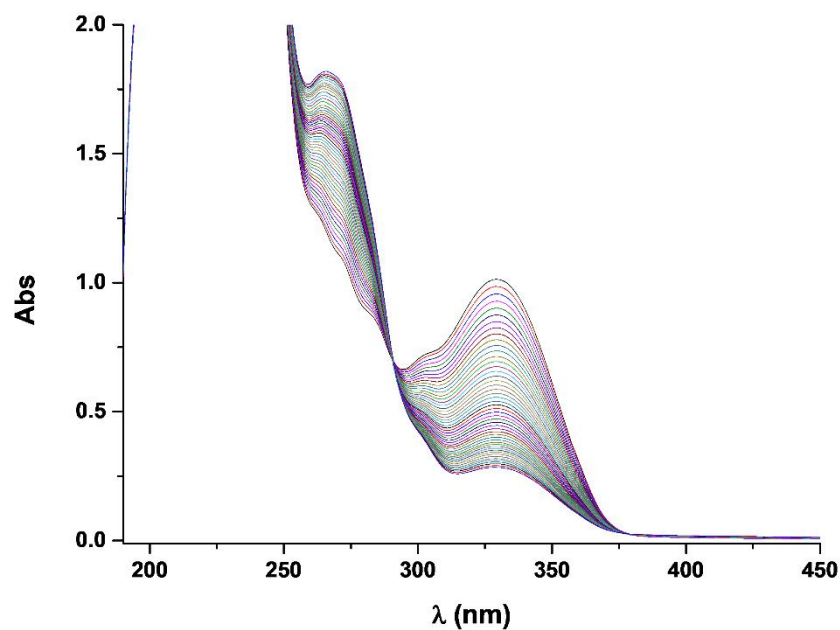

**Figure S11.** UV-vis spectra of SC4OC6/TMZ (0.2 and 0.1 mM respectively) in 10 mM phosphate buffer recorded every 15 minutes at 37 °C.

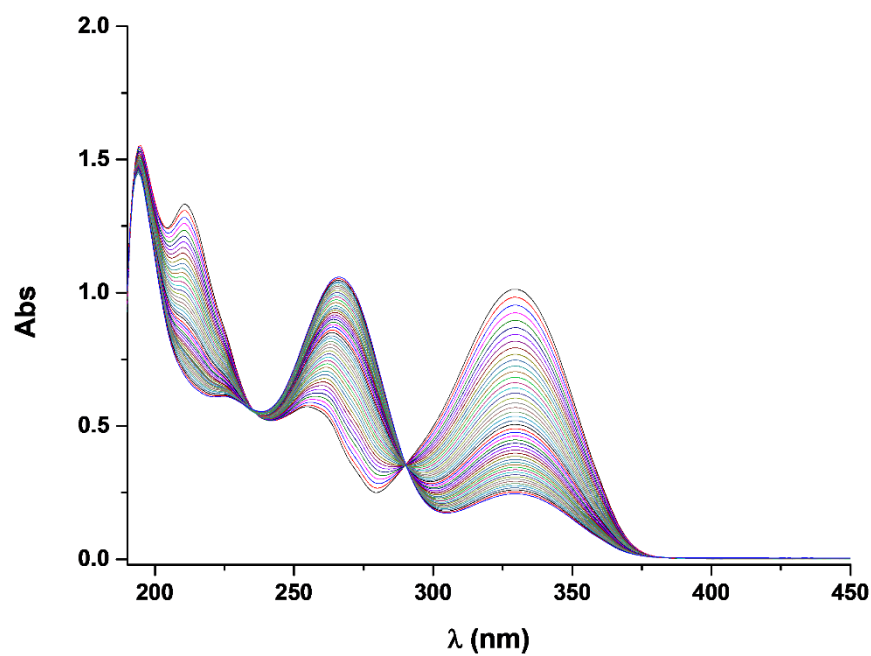

**Figure S12.** UV-vis spectra of TMZ (0.1 mM) in 10 mM phosphate buffer recorded every 15 minutes at 37 °C.

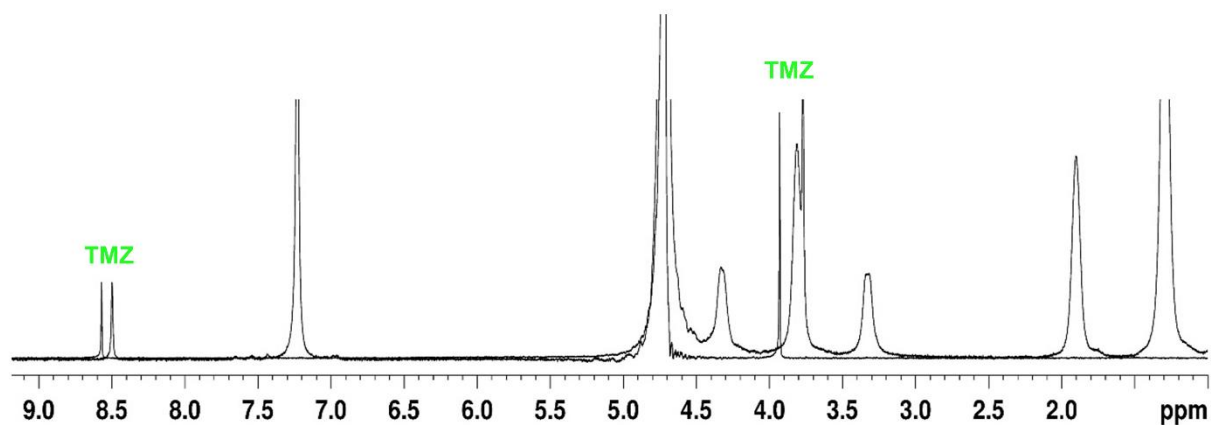

**Figure S13.** Overlapped  $^1\text{H}$  NMR spectra ( $\text{D}_2\text{O}$ , phosphate buffer, 297 K) of TMZ (4.5 mM) and lyophilized SC4OC6/CUR/TMZ (7.4 mM/0.95 mM/4.6 mM).

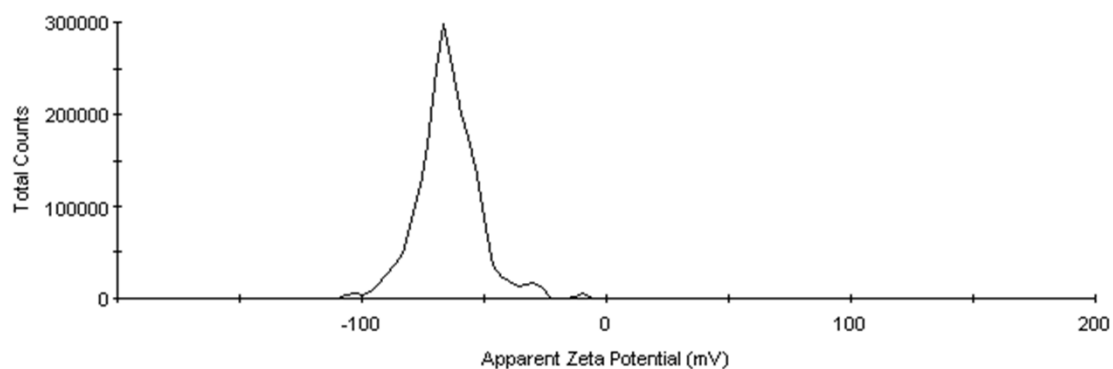

**Figure S14.** Zeta potential distribution of SC4OC6/CUR/TMZ (0.85 mM/0.11 mM/0.5 mM) in 10 mM phosphate buffer.

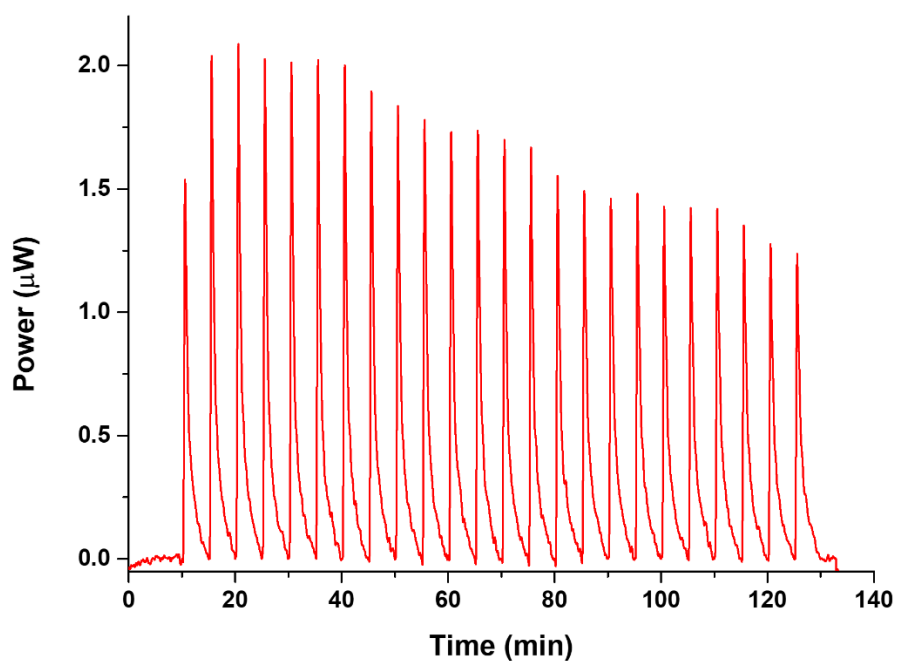

**Figure S15.** ITC titration curve of TMZ 5 mM into SC4OC6 0.3 mM (above CMC) at 25 °C in 10 mM phosphate buffer.

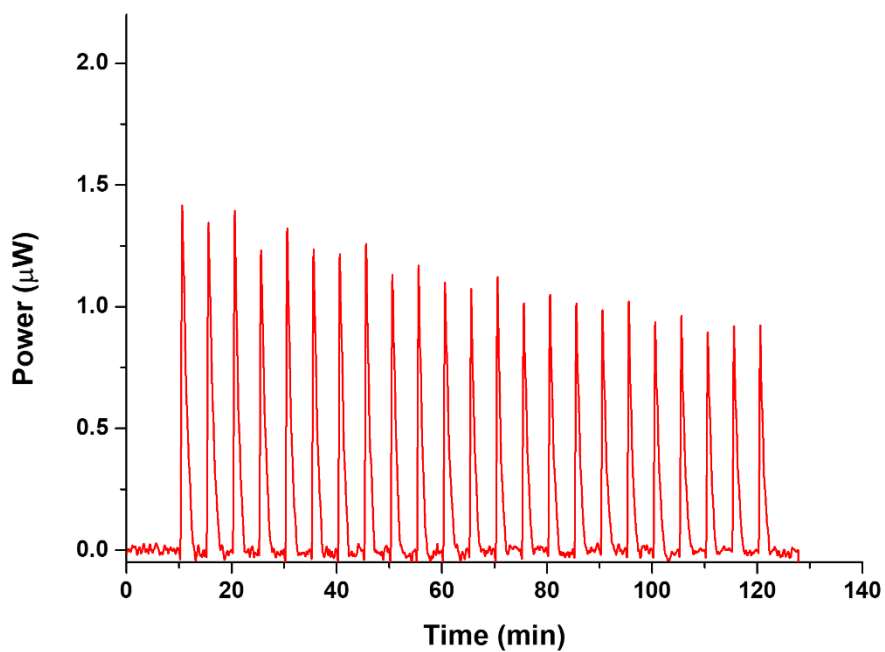

**Figure S16.** Typical "blank" experiment. ITC titration curve of TMZ 5 mM into phosphate buffer 10 mM at 25 °C.

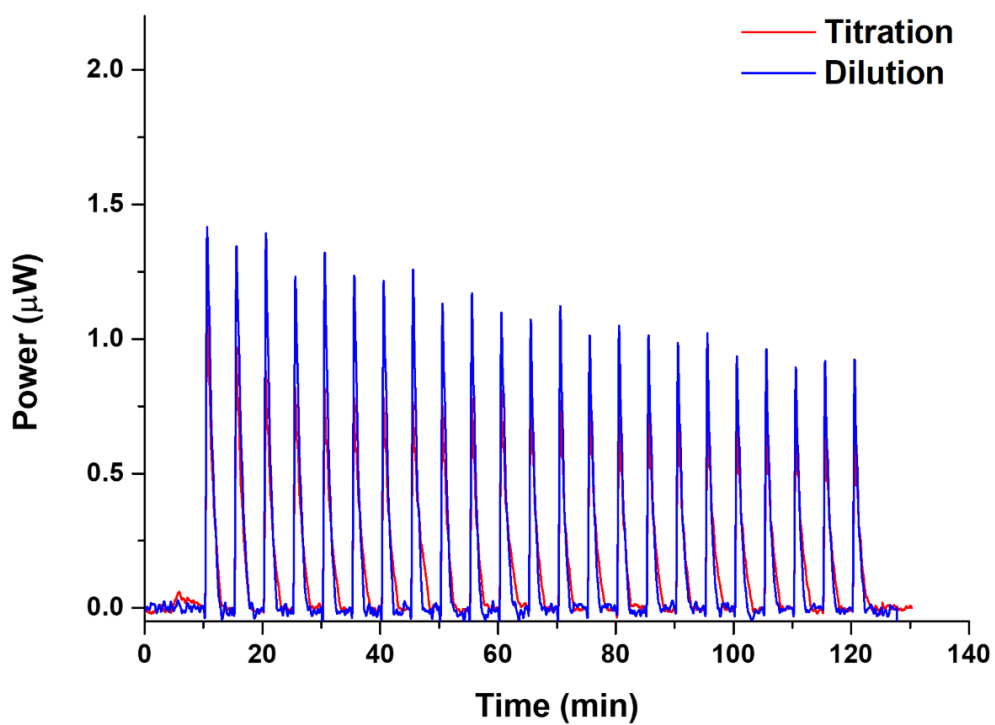

**Figure S17.** Overlap between TMZ (5 mM) into SC4OC6 (0.02 mM, below CMC) calorimetric titration (red) and the corresponding blank experiment (blue) at 25 °C in 10 mM phosphate buffer.

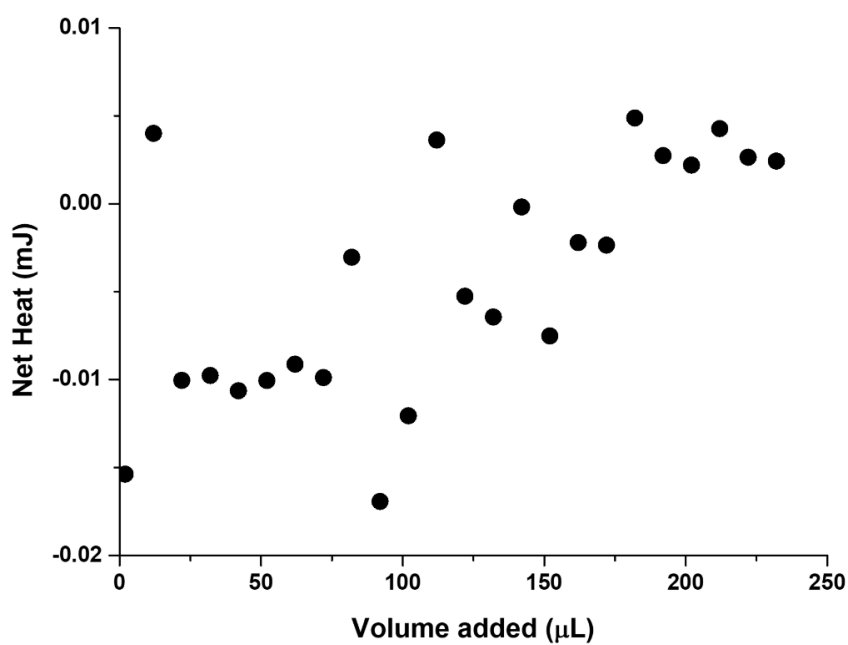

**Figure S18.** Net heat curve for the TMZ (5 mM) / SC4OC6 (0.02 mM, below CMC) system.

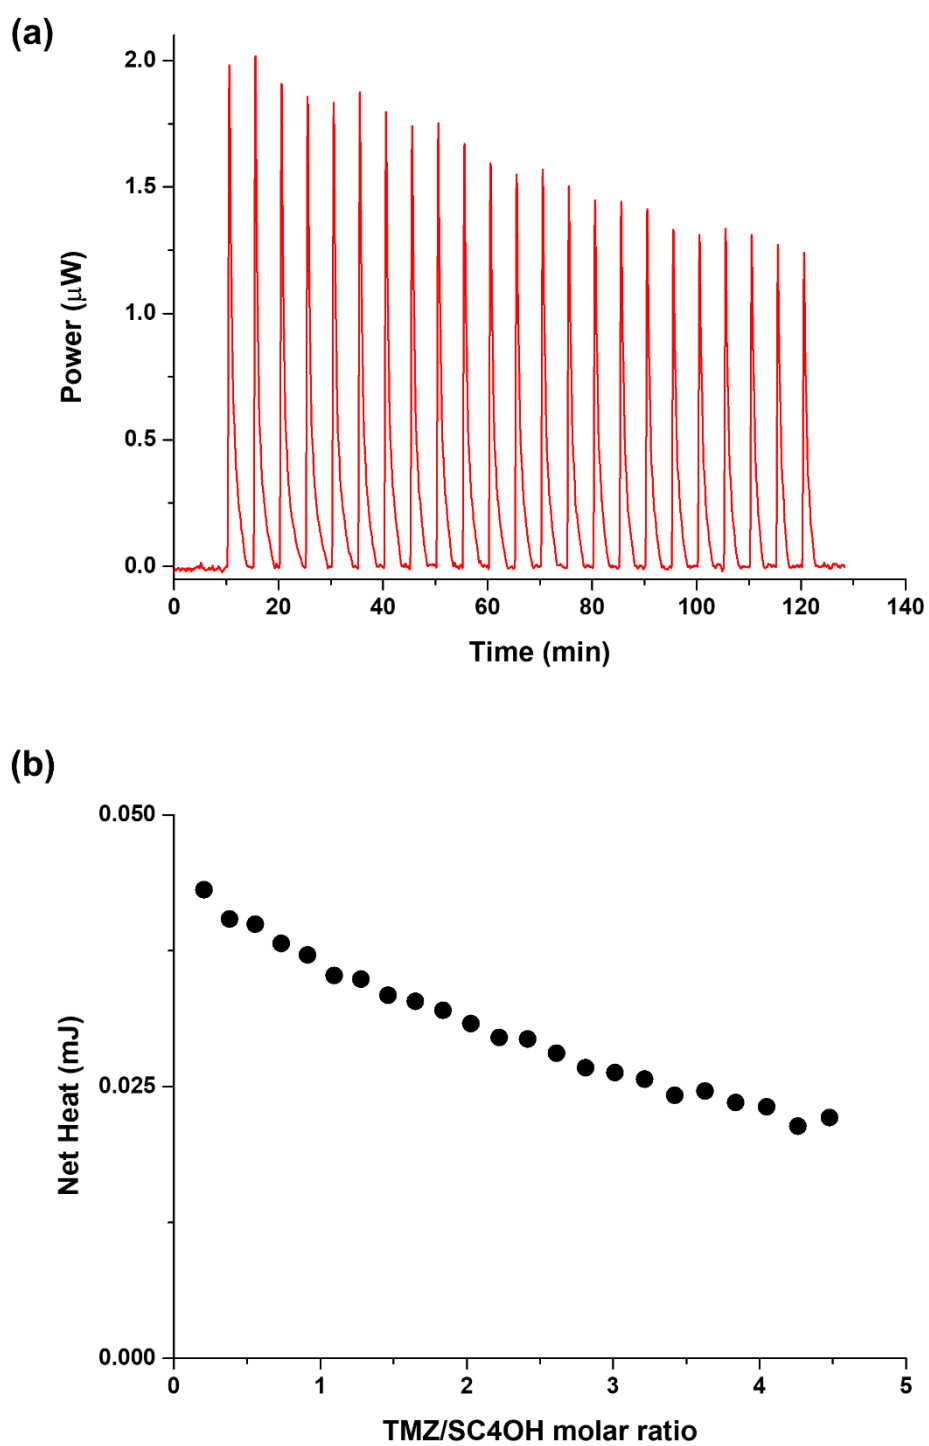

**Figure S19.** (a) ITC titration curve of TMZ 5 mM into SC4OH 0.3 mM at 25 °C in 10 mM phosphate buffer; (b) integrated heat data.

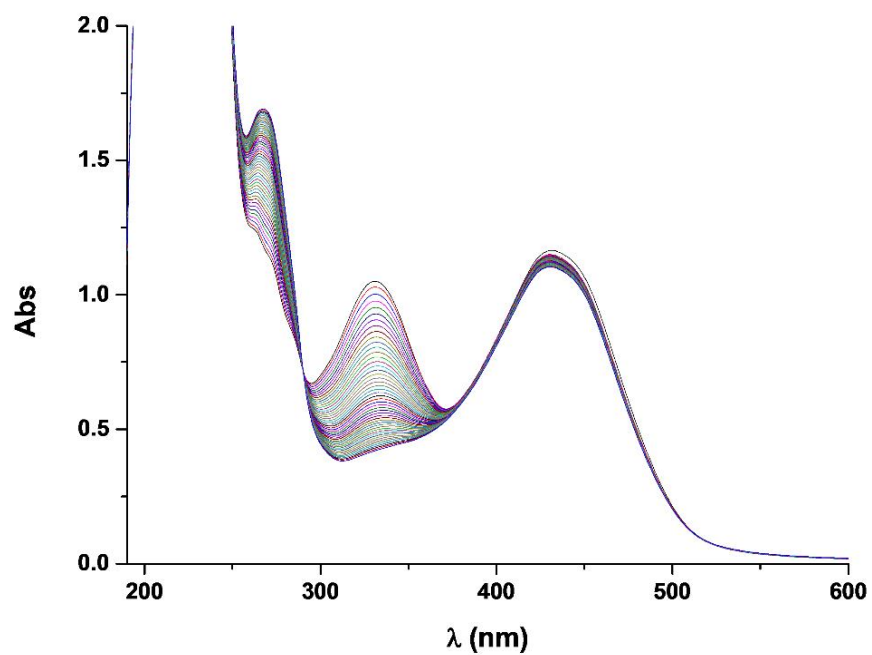

**Figure S20.** UV-vis spectra of SC4OC6/CUR/TMZ (0.2, 0.025 and 0.1 mM respectively) in 10 mM phosphate buffer recorded every 15 minutes at 37 °C.

**Table S3.** First order degradation rate constant and half-life values for free TMZ, TMZ-SC4OC6 micelles and TMZ-SC4OC6 micelles loading curcumin in 10 mM phosphate buffer at 37 °C.

|                                         | <b>k</b><br><b>(min<sup>-1</sup>)</b> | <b>t<sub>1/2</sub></b><br><b>(h)</b> |
|-----------------------------------------|---------------------------------------|--------------------------------------|
| Free TMZ                                | 0.00199 (1)                           | 5.8                                  |
| TMZ-SC4OC6 micelles                     | 0.00183 (1)                           | 6.3                                  |
| TMZ-SC4OC6 micelles<br>loading curcumin | 0.00139 (1)                           | 8.3                                  |
